# Supplementary material for: A dual-nanozyme-loaded black phosphorus multifunctional therapeutic platform for combined photothermal/photodynamic/starvation cancer therapy
Source: Royal Society of Chemistry journal article supplement (doi:10.1039/d3tb00372h), 2023-01-01
Supplement: d3tb00372h1.pdf [file d3tb00372h1.pdf]

## Supplementary information

### **A dual-nanozyme-loaded black phosphorus multifunctional therapeutic platform for combined Photothermal/Photodynamic/Starvation cancer therapy**

*Wenxiang Du*<sup>a,b,#</sup>, *Weijian Chen*<sup>a,b,#</sup>, *Jing Wang*<sup>c,#</sup>, *Hongjie Zhang*<sup>a,b</sup>, *Lei Song*<sup>a,b,\*</sup>,  
*Yuan Hu*<sup>a,b,\*</sup>, *Xiaopeng Ma*<sup>c,\*</sup>

a State Key Laboratory of Fire Science, University of Science and Technology of China, Huangshan Road 443, Hefei, Anhui, P.R. China

b Cas Key Lab of Soft Matter Chemistry, School of Chemistry and Materials Science, University of Science and Technology of China, Jinzhai Road 96, Hefei, Anhui, P.R. China

c Department of thyroid and breast Surgery, The First Affiliated Hospital of University of Science and Technology of China; Division of Life Sciences and Medicine, University of Science and Technology of China, Huangshan Road 443, Hefei, Anhui, P.R. China

# These authors contributed equally to this study.

\* Corresponding authors: [yuanhu@ustc.edu.cn](mailto:yuanhu@ustc.edu.cn), Tel: (+86) 551-63601664; [leisong@ustc.edu.cn](mailto:leisong@ustc.edu.cn), Tel (+86) 551-63600081; [XiaopengMa@fsyy.ustc.edu.cn](mailto:XiaopengMa@fsyy.ustc.edu.cn), Tel: (+86) 15077904628.

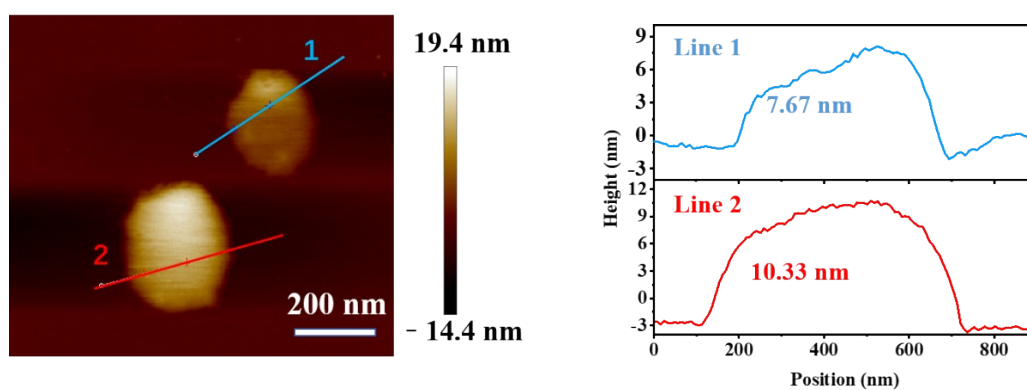

**Fig S1.** Thickness of black phosphorus nanosheet and corresponding data

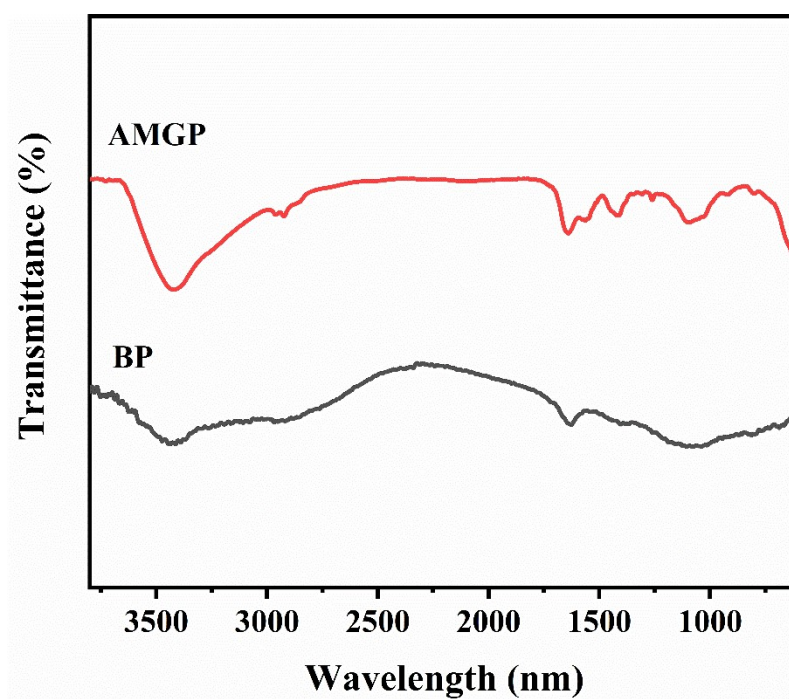

**Fig. S2.** Fourier transform infrared (FT-IR) spectra of AMGP.

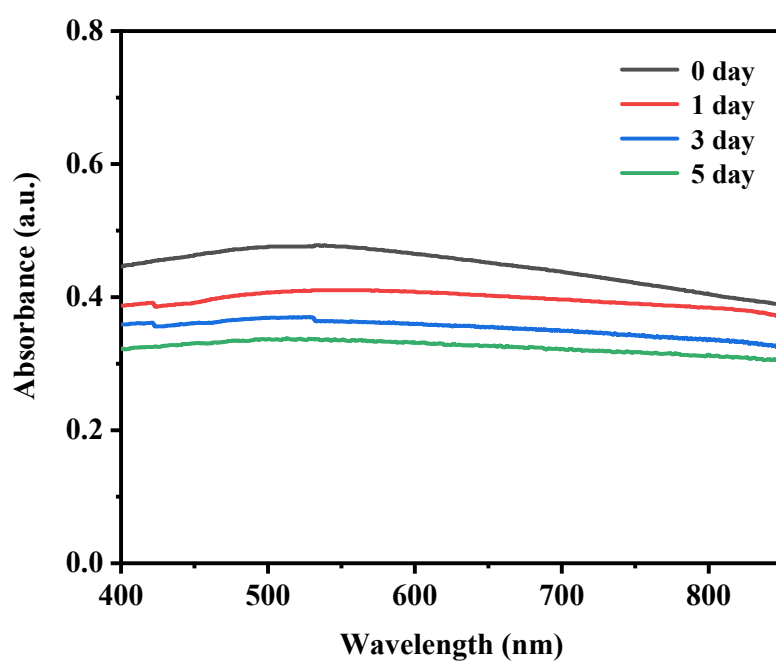

**Fig. S3.** Ultraviolet-visible absorption spectra of AMGP within 5 days.

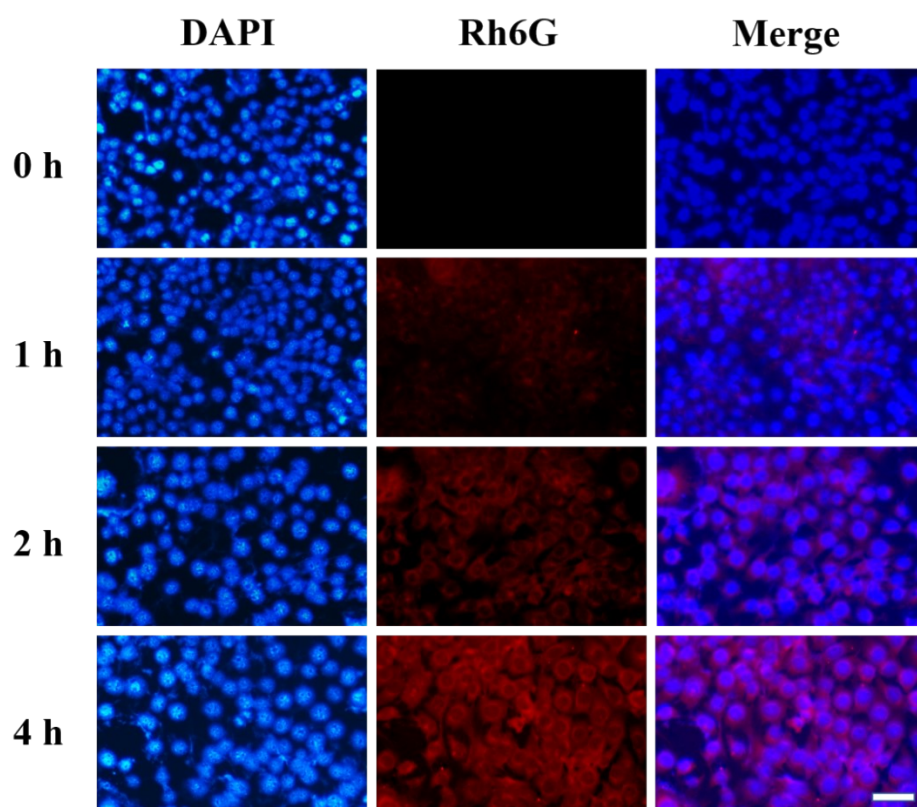

**Fig. S4.** Confocal images of 4T1 cells incubated with Rh6G@AMGP for different times, scale bar: 100  $\mu\text{m}$ .

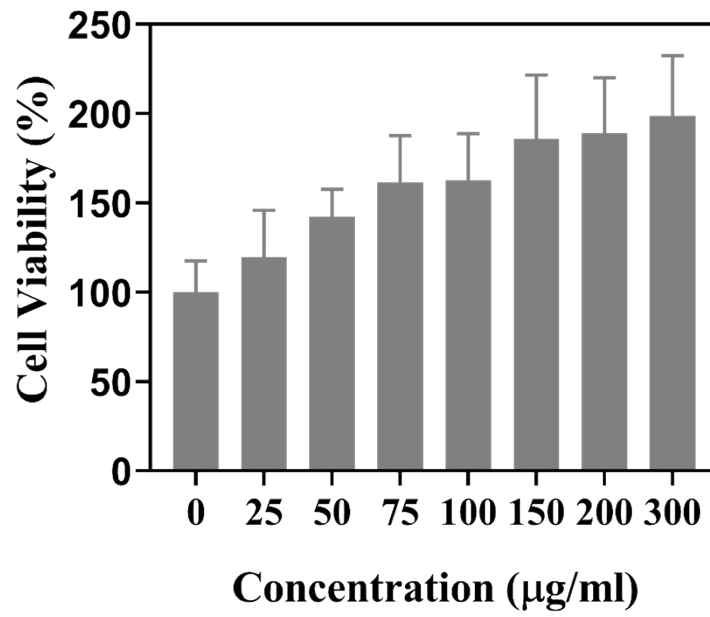

**Fig. S5.** Survival rate of 4T1 cells at different glucose concentrations.

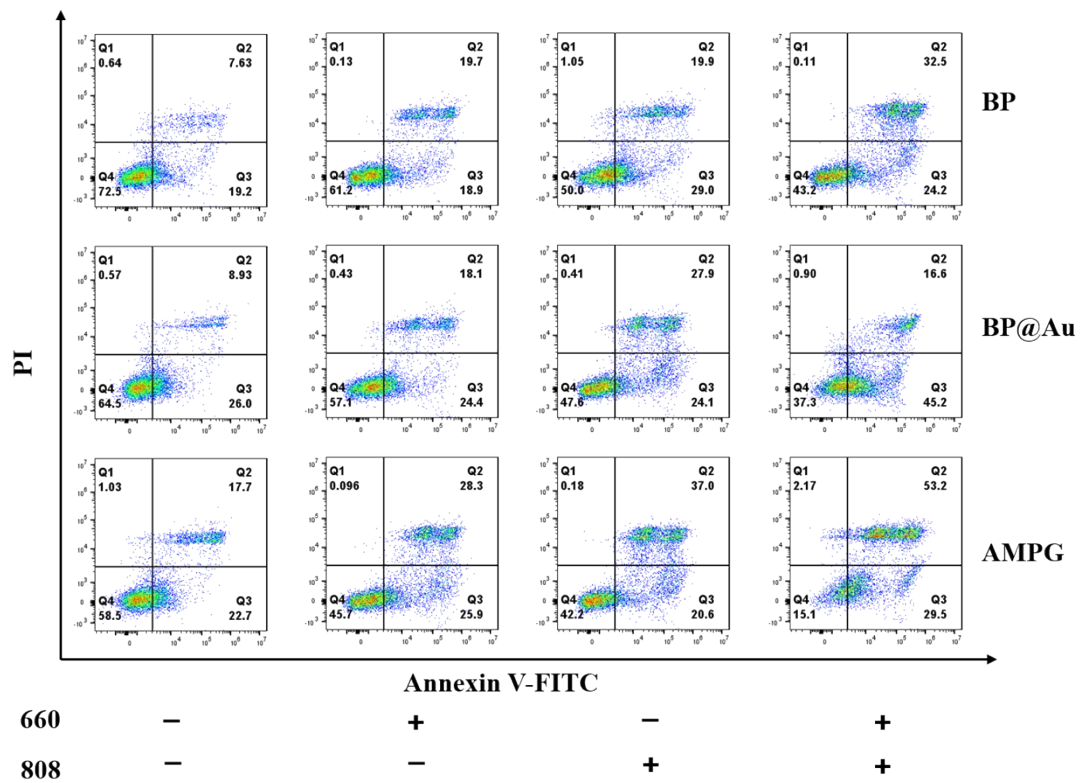

**Fig. S6.** Flow cytometry analysis of 4T1 cells incubated with different materials of the same concentration after different treatments.

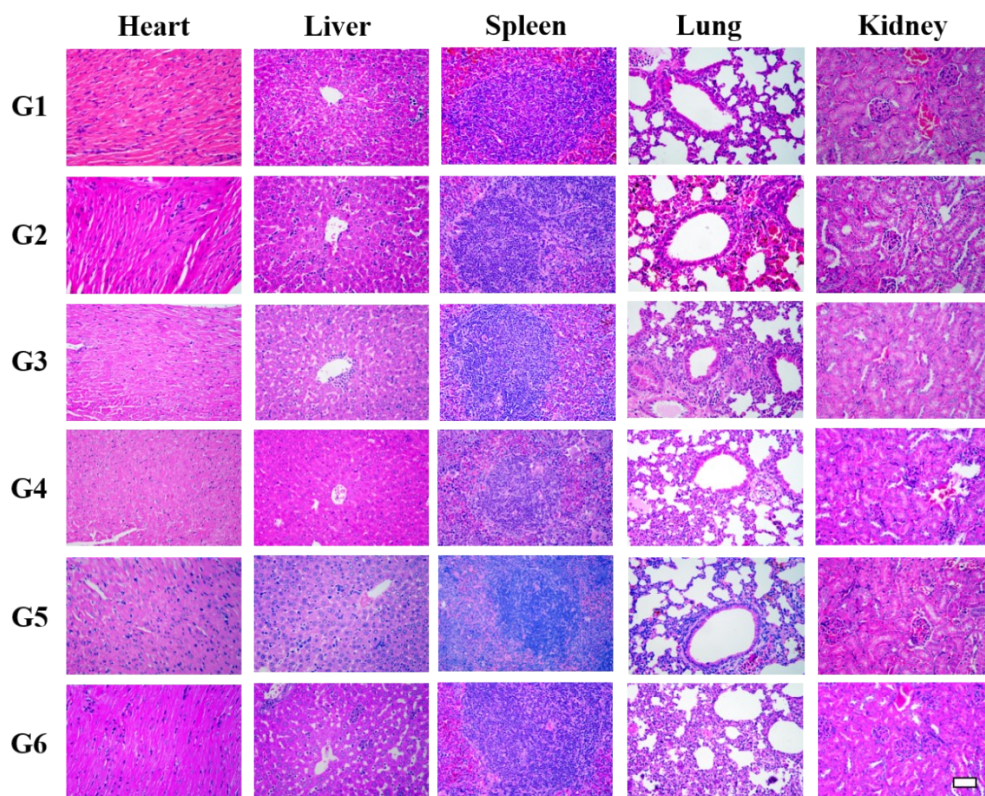

**Fig. S7.** H&E staining of major mouse organs.

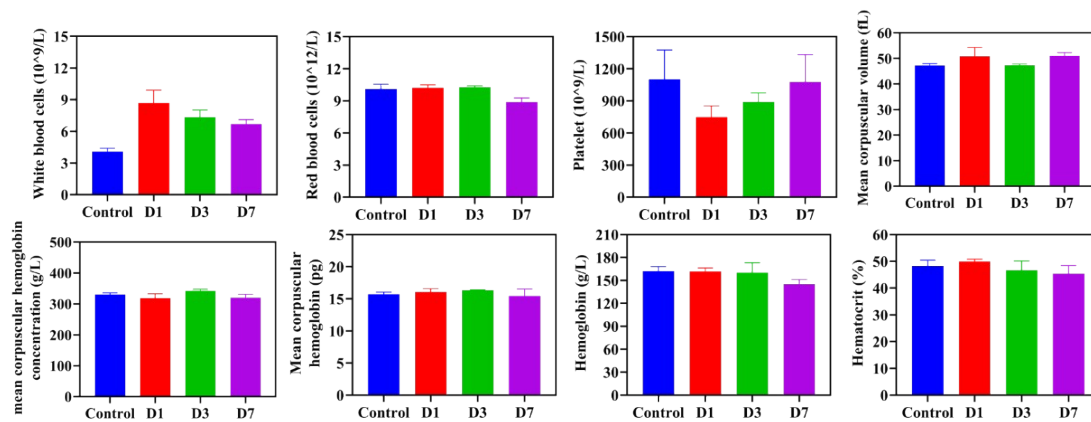

**Fig. S8.** Blood routine parameters at different times.

**Table S1.** Blood biochemical tests for liver and kidney function indicators

|                | ALT (U/L)                        | AST (U/L)                        | BUN(mmol/L)                     | CRE( $\mu$ mol/L)                |
|----------------|----------------------------------|----------------------------------|---------------------------------|----------------------------------|
| <b>Control</b> | <b>14.85<math>\pm</math>5.57</b> | <b>18.37<math>\pm</math>6.47</b> | <b>6.36<math>\pm</math>1.38</b> | <b>40.72<math>\pm</math>3.51</b> |
| <b>PAMG</b>    | <b>12.33<math>\pm</math>2.98</b> | <b>22.04<math>\pm</math>5.93</b> | <b>6.56<math>\pm</math>0.37</b> | <b>34.43<math>\pm</math>8.63</b> |
